1        **Diagnostic performance of the fragmented QRS complex on electrocardiogram for**  
2        **detecting myocardial scars assessed by 3.0 Tesla cardiac magnetic resonance imaging**

3

4        Kasin Viriyanukulvong, M.D.<sup>1,\*</sup>,

5        Nonthikorn Theerasuwipakorn, M.D., M.Sc.<sup>1,2,\*</sup>,

6        Wanwarang Wongcharoen, M.D.<sup>3</sup>,

7        Paisit Kosum, M.D., M.Sc.<sup>4</sup>,

8        Ronpichai Chokesuwattanaskul, M.D., M.Sc.<sup>1,5,\*\*</sup>

9

10       <sup>1</sup> *Division of Cardiovascular Medicine, Department of Medicine, Faculty of Medicine,*  
11       *Chulalongkorn University, King Chulalongkorn Memorial Hospital, Bangkok, Thailand*

12       <sup>2</sup> *Cardiac Center, King Chulalongkorn Memorial Hospital, Bangkok, Thailand*

13       <sup>3</sup> *Division of Cardiovascular Medicine, Department of Medicine, Chiang Mai University,*  
14       *Chiang Mai, Thailand*

15       <sup>4</sup> *Division of Cardiovascular Medicine, Department of Medicine, Faculty of Medicine,*  
16       *Naresuan University, Phitsanulok, Thailand*

17       <sup>5</sup> *Center of Excellence in Arrhythmia Research, Cardiac Center, King Chulalongkorn*  
18       *Memorial Hospital, Bangkok, Thailand*

19

20       **\* These authors contribute equally.**

21

22 **\*\* Corresponding author**

23 Ronpichai Chokesuwattanaskul

24 Division of Cardiovascular Medicine, Department of Medicine, Faculty of Medicine,

25 Chulalongkorn University, and Center of Excellence in Arrhythmia Research, Cardiac

26 Center, King Chulalongkorn Memorial Hospital, Bangkok, Thailand

27 Email: Ronpichai.c@chula.ac.th; Phone: (+66)2 256 4000

28

29 **Author Contributions**

30 K.V. conducted the study, performed biostatistical analyses, prepared the tables and figures,

31 interpreted the data and drafted the manuscript. N.T. conducted the study, analyses the data,

32 and critical reviewed manuscript. P.K. provided the CMR data. W.W. revised manuscript and

33 provided feedback. R.C. supervised the study.

34 **ABSTRACT**

35 **Background:** Fragmented QRS complex (f-QRS) on a 12-lead electrocardiogram (EKG)  
36 with a 0.15-100 or 150 Hz low-pass filter is known to be related to ischemic myocardial  
37 scars. Cardiac magnetic resonance (CMR) imaging enhances tissue characterization  
38 capability resulting in a better myocardial scar assessment over other noninvasive imaging  
39 modalities. However, the diagnostic values of f-QRS on non-ischemic scars and f-QRS from  
40 EKG with a 0.15-40 Hz low-pass filter (routine filter in clinical practice) are unknown. This  
41 study aims to evaluate the diagnostic performance of f-QRS (from EKG with 0.15-40 and  
42 0.15-100 Hz low-pass filters) for detecting any myocardial scars (both ischemic and non-  
43 ischemic) assessed by 3.0 Tesla CMR.

44 **Methods:** This cross-sectional study included patients who underwent a 3.0 Tesla CMR scan  
45 from May 2020 to May 2023. A 12-lead EKG with 0.15-40 and 0.15-100 Hz low-pass filters,  
46 performed on the same day of the CMR scan, was assessed for the presence of f-QRS. The  
47 ECG leads were divided into 3 categories (e.g., anterior leads V1-V4; lateral leads I, aVL,  
48 V5-V6; and inferior leads II, III, aVF). The f-QRS was defined as the presence of R' wave or  
49 notching in the nadir of the S wave in 2 contiguous leads. The primary outcome was the  
50 diagnostic performance of f-QRS from EKG in myocardial scar detection in the  
51 corresponding left ventricle (LV) segments. The secondary outcomes were to compare the  
52 diagnostic performance of f-QRS in detecting ischemic scars and non-ischemic scars, the  
53 diagnostic performance between f-QRS diagnosed from 0.15-40 and 0.15-100 Hz low-pass  
54 filters, and the diagnostic performance of f-QRS presented in 2 consecutive leads and f-QRS  
55 presented in solitary lead.

56 **Results:** The study involved 1,692 participants with a median age of 67 (IQR: 59-85) years  
57 old and 52.5% males. Myocardial scars were found in 826 (49%) participants. Male, history  
58 of CAD, and myocardial scars were significantly more frequent in the participants with f-  
59 QRS (59.4% vs 46.0%, 26.4% vs 20.6%, and 48.9% vs 37.3%, respectively), while median  
60 LVEF was lower (61%, IQR 47, 66 vs 62%, IQR 55, 68;  $p < 0.001$ ). The sensitivity,  
61 specificity, positive predictive value, negative predictive value, and AUC of f-QRS from  
62 EKG with 0.15-100 Hz low-pass filter for detecting myocardial scars were 25.6%, 88.7%,  
63 45.1%, 76.8%, and 0.57 for anterior segments; 22.1%, 91.5%, 36.8%, 84.1%, and 0.57 for  
64 lateral segments; and 42.9%, 63.4%, 36.9, 68.9%, and 0.53 for inferior segments. The  
65 sensitivity, PPV, and positive likelihood ratio (LR+) of f-QRS were higher for detecting non-  
66 ischemic scars while specificity, NPV, negative likelihood ratio (LR-), and AUC were not  
67 significantly different. The f-QRS from 0.15-100 Hz showed a higher sensitivity but lower  
68 specificity, PPV, and LR+ for all LV segments. The f-QRS presented in the solitary lead  
69 showed a higher sensitivity with a lower specificity, PPV, and LR+.

70 **Conclusion:** This study demonstrates a high specificity and negative predictive value of f-  
71 QRS from a 12-lead EKG with 0.15-40 and 0.15-100 Hz low-pass filters in diagnosing  
72 myocardial scars when correlated to the corresponding LV segments.

73

74 **Keywords:** Fragmented QRS; electrocardiogram; cardiac magnetic resonance; myocardial  
75 scar; low-pass filter

## 76 INTRODUCTION

77 The 12-lead electrocardiogram (EKG) is a fundamental tool in diagnosing various  
78 cardiac conditions and is universally available. (1) Abnormal electrical conduction through  
79 areas of fibrosing myocardium (e.g., myocardial scars) can lead to the expression of the  
80 fragmented QRS complex (f-QRS) on the EKG waveform. (2, 3) In 2006, Das and colleagues  
81 established a correlation between f-QRS and myocardial scars detected by single photon  
82 emission computed tomography (SPECT) in patients with coronary artery disease (CAD).  
83 Their study demonstrated higher sensitivity and negative predictive value (NPV) of f-QRS  
84 compared to Q waves. (4) Moreover, the presence of f-QRS correlated with adverse clinical  
85 outcomes such as mortality, CAD, and heart failure. (5, 6) However, previous publications  
86 primarily focused on the scars assessed by nuclear imaging, limiting data from cardiac  
87 magnetic resonance (CMR) imaging which is considered the gold standard noninvasive  
88 imaging modality for assessing myocardial scars. (7) Furthermore, the diagnostic  
89 performance of f-QRS in detecting myocardial scars other than ischemic scars was still  
90 unknown. To enhance f-QRS detection sensitivity, previous studies typically set a low-pass  
91 filter between 0.15-100 and 0.15-150 Hz which was not routinely used in clinical practice. (8)

92 Therefore, we aim to assess the diagnostic performance of f-QRS for detecting any  
93 myocardial scars (both ischemic and non-ischemic) assessed by CMR. In addition, this study  
94 also compares the performance of f-QRS from each filter range (0.15-40 and 0.15-100 Hz  
95 low-pass filters) and 2 consecutive leads vs solitary lead.

96

## 97 MATERIALS AND METHODS

98 This cross-sectional study enrolled patients aged 18 years or older who underwent a  
99 3.0 Tesla CMR scan with perfusion protocol from May 2020 to May 2023 at King  
100 Chulalongkorn Memorial Hospital, Bangkok, Thailand. The key exclusion criteria were  
101 patients with (i) a recent myocardial infarction within 30 days, (ii) pre-excitation syndrome,  
102 (iii) uninterpretable EKG, and (iv) inadequate CMR image quality for scar assessment. The  
103 baseline characteristics of the participants were retrieved from medical electronic databases.  
104 The study protocol was reviewed and approved by the Institutional Research Committee,  
105 Faculty of Medicine, Chulalongkorn University (IRB No. 0660/66).

106

### 107 **Electrocardiogram collection and interpretation**

108 A surface 12-lead EKG with 0.15-40 and 0.15-100 Hz low-pass filters was performed  
109 on the same day of the CMR scan using a digital machine, the PageWriter TC 70 (Philips,  
110 Eindhoven, the Netherlands). The EKG was run with a paper speed of 25 mm/s and an  
111 amplitude of 10 mm/mV. The EKG waveforms were electrically transmitted to the  
112 Tracemaster system and analyzed on automatic analysis software (IntelliSpace ECG, Philips,  
113 Eindhoven, The Netherlands) with manual correction. EKG with each filter range was  
114 assessed independently for f-QRS by two cardiologists (K.V. and R.C.) blinded to the CMR  
115 results. An electrophysiologist (W.W.) adjudicated the EKG findings in case of discordancy.  
116 The f-QRS is defined as the presence of an additional R wave (R') or notching in the nadir of  
117 the S wave in 2 contiguous leads (4, 9). The f-QRS in a solitary lead was also gathered owing  
118 to the discrete nature of non-ischemic cardiomyopathy scars, which may not align with

119 coronary artery territories and might have the potential to detect smaller scar areas in non-  
120 ischemic conditions.

121

## 122 **CMR image acquisition and post-processing**

123 All enrolled patients were scanned with perfusion protocol using a 3.0 Tesla scanner  
124 (Magnetom Vida, Siemens Healthineers, Erlangen, Germany) with an 18-channel cardiac  
125 phased array receiver. Gadobutrol (Gadovist, Bayer Healthcare, Leverkusen, Germany) or  
126 Gadoterate meglumine (Dotarem; Guerbet, Villepinte, France) with a total dose of 0.15  
127 mmol/kg was injected during first-pass perfusion images acquisition. Late gadolinium  
128 enhancement (LGE) images with optimal inversion time (Ti) received from Ti scout were  
129 acquired 5-10 minutes after gadolinium injection. Spoiled gradient echo with phase-sensitive  
130 reconstruction (PSIR) acquired during breath holding in 2-chamber, 3-chamber, 4-chamber,  
131 and short-axis stack covering the whole ventricle was used as a primary pulse sequence for  
132 LGE images acquisition and interpretation. If patients could not perform breath holding or  
133 significant arrhythmia occurred, single-shot, non-breath holding, steady-state free precession  
134 pulse sequence was utilized for LGE images instead. Each slice was configured with a 6 mm  
135 thickness without a slice gap. Myocardial scar was diagnosed when LGE was visualized in  
136 two orthogonal planes and further classified into ischemic scars (subendocardial and  
137 transmural) and non-ischemic scars (mid-wall, subepicardial, and patchy). (10)

138 Post-processing software (Syngo.via, Siemens Healthineers, Erlangen, Germany) was  
139 used to analyze images. Data regarding the presence of myocardial scars was retrieved from  
140 the CMR reports validated by experienced CMR imaging specialists.

141

## 142 **EKG leads and LV segmentation**

143 EKG leads and LV segments were divided into 3 groups correlated to each other.  
144 EKG leads V1-V4 were categorized as anterior leads and interpreted as corresponding to the  
145 myocardial scar in anterior segments of LV (basal anterior, basal anteroseptal, mid anterior,  
146 mid anteroseptal, apical anterior, apical septal, and apical cap segments). EKG leads I, aVL,  
147 and V5-V6 were categorized as lateral leads and interpreted as corresponding to the  
148 myocardial scar in lateral segments of LV (basal anterolateral, basal inferolateral, mid  
149 anterolateral, mid inferolateral, and apical lateral segments). EKG leads II, III, and aVF were  
150 categorized as inferior leads and interpreted as corresponding to the myocardial scar in  
151 inferior segments of LV (basal inferoseptal, basal inferior, mid inferoseptal, mid inferior, and  
152 apical inferior segments). [\[Graphical Abstract\]](#)

153

## 154 **Primary and secondary outcomes**

155 The primary outcome was the diagnostic performance of f-QRS from EKG with 0.15-  
156 100 Hz low-pass filter in myocardial scar detection in the corresponding left ventricle (LV)  
157 segments which was described by sensitivity, specificity, positive predictive value (PPV),  
158 NPV, positive (LR+) and negative likelihood ratio (LR-), and area under the receiver  
159 operating characteristic (ROC) curve (AUC). The secondary outcomes were (i) to compare  
160 the diagnostic performance of f-QRS in detecting ischemic scars and non-ischemic scars, (ii)  
161 to compare the diagnostic performance between f-QRS diagnosed from 0.15-40 (routine) and  
162 0.15-100 Hz (standard) low-pass filters, and (iii) to compare the diagnostic performance of f-  
163 QRS presented in 2 consecutive leads and f-QRS presented in solitary lead.

164



## 165 **Statistical analysis**

166 Categorical data was presented as frequency with percentage and analyzed with the  
167 Chi-square or Fisher's exact tests as appropriate. Continuous data was displayed as mean with  
168 standard deviation (SD) or median with interquartile range (IQR) and analyzed with  
169 independent t-test or Mann-Whitney U test as appropriate. The sensitivity, specificity, PPV,  
170 NPV, LR+, and LR- were calculated to demonstrate the diagnostic performance of f-QRS.  
171 ROC curve was employed to investigate the relationship between f-QRS and myocardial scar  
172 which presented as AUC. Two assessors of EKG were tested for inter- and intra-observer  
173 reliability. A p-value of less than 0.05 is considered statistically significant. The statistical  
174 analyses were conducted using the IBM SPSS software, version 29 for Windows.

175

## 176 **RESULTS**

### 177 **Study population and baseline characteristics**

178 A total of 1,728 patients were identified by searching the electrical database from  
179 May 2020 to May 2023. Twenty-four patients with recent-onset myocardial infarction, 6  
180 patients with uninterpretable EKG, and 6 patients with inadequate CMR image quality were  
181 excluded, leaving 1,692 participants for the analyses [Figure 1]. The median age was 67  
182 (IQR: 59, 85) years old and 52.5% were male. 826 (49%) participants exhibited f-QRS on  
183 EKG. Hypertension, diabetes mellitus, and dyslipidemia were present in 1,082 (64%), 517  
184 (30.6%), and 1,107 (65.5%) participants, respectively. The median estimated glomerular  
185 filtration rate (eGFR) was 78 (IQR: 61, 91) mL/min/1.73m<sup>2</sup>. A history of CAD was found in  
186 396 (23.4%) participants with 13.3% and 2.2% who had experienced percutaneous coronary  
187 intervention and coronary artery bypass graft surgery, respectively. The median left

188 ventricular ejection fraction (LVEF) was 61% (IQR; 52, 67). 727 (43%) participants revealed  
189 myocardial scars on CMR imaging (ischemic scars 25.7% and non-ischemic scars 19.4%).  
190 Myocardial scars were present in the anterior segments in 449 (26.5%) participants, the  
191 lateral segments in 308 (18.2%) participants, and the inferior segments in 564 (33.3%)  
192 participants. [\[Table 1\]](#)

193 Male, history of CAD, and myocardial scars were significantly more frequent in the  
194 participants with f-QRS (59.4% vs 46%, p-value < 0.001 for male; 26.4% vs 20.6%, p-value  
195 0.005 for CAD; and 48.9% vs 37.3%, p-value < 0.001 for the presence of scars), while  
196 median LVEF was lower (61%, IQR 47, 66 vs 62%, IQR 55, 68; p < 0.001). Other baseline  
197 characteristics were not significantly different between the 2 groups.

198 The interobserver reliability for the presence of f-QRS was 0.78 (95% CI: 0.53, 0.94)  
199 as determined by Fleiss' Kappa coefficient. The overall intraobserver for the presence of f-  
200 QRS was 0.78 (95% CI: 0.61-0.90) using the intraclass correlation coefficient (ICC).

201

## 202 **Primary outcome**

203 The sensitivity, specificity, PPV, NPV, LR+, LR-, and AUC of f-QRS from EKG  
204 with 0.15-100 Hz low-pass filter for detecting myocardial scars were 25.6%, 88.7%, 45.1%,  
205 76.8%, 2.27, 0.84, and 0.57 for anterior segments; 22.1%, 91.5%, 36.8%, 84.1%, 2.61, 0.85,  
206 and 0.57 for lateral segments; and 42.9%, 63.4%, 36.9, 68.9%, 1.17, 0.9, and 0.53 for inferior  
207 segments. [\[Table 2 and Graphical Abstract\]](#)

208

## 209 **Secondary outcomes**

210 *f*-QRS for detecting ischemic and non-ischemic scars

211 The sensitivity, PPV, and LR+ of *f*-QRS were higher for detecting non-ischemic scars  
212 compared to ischemic scars while specificity, NPV, LR-, and AUC were not significantly  
213 different. These findings were not only similar for all EKG categories and LV segments but  
214 also independent of low-pass filters. [\[Supplementary Table 1\]](#)

215

216 *f*-QRS from 0.15-40 (routine) vs 0.15-100 Hz (standard) low-pass filter

217 The *f*-QRS from 0.15-100 Hz showed a higher sensitivity but lower specificity, PPV,  
218 and LR+ for all EKG categories and LV segments. NPV, LR-, and AUC were not  
219 significantly different between the 2 filters. [\[Table 2\]](#)

220

221 *f*-QRS presented in 2 consecutive leads vs presented in the solitary lead

222 Compared with standard 2 consecutive leads, *f*-QRS presented in the solitary lead  
223 showed a higher sensitivity with a lower specificity, PPV, and LR+. NPV and AUC were not  
224 significantly different. LR- of *f*-QRS in the solitary lead was lower in anterior and lateral  
225 segments but higher in the inferior segment. [\[Supplementary table 2\]](#)

226

## 227 **DISCUSSION**

228 This study investigated the diagnostic performance of *f*-QRS for detecting any  
229 myocardial scars (both ischemic and non-ischemic) assessed by CMR. To the best of our  
230 knowledge, the current study included the largest size of participants and the only study that

231 assessed myocardial scars by using 3.0 Tesla CMR. The f-QRS from EKG with 0.15-100 Hz  
232 low-pass filter was found in half of the total participants. Participants with f-QRS had more  
233 underlying CAD, lower LVEF, and more myocardial scars (both ischemic and non-ischemic).

234 This study demonstrated unsatisfactory diagnostic performance of f-QRS from 0.15-  
235 100 Hz low-pass filter EKG for detecting myocardial scars in every EKG lead and LV  
236 segment with a sensitivity of 22-43%, PPV of 36-45%, LR+ of 1.17-2.61, LR- of 0.84-0.9,  
237 and AUC of 0.53-0.57. The specificity (63-91%) and NPV (69-84%) were the only 2  
238 parameters that showed desirable values. Surprisingly, this study's results were different from  
239 most of the previous publications that reported a high sensitivity (78-86%), specificity (65-  
240 93%), PPV (39-84%), and NPV (88-91%). (4, 7, 11, 12) All of these studies utilized stress  
241 SPECT with Technetium-99m (<sup>99m</sup>Tc) sestamibi as a modality for myocardial scar  
242 assessment. In contrast to our study, we used CMR which is considered the gold standard  
243 noninvasive test for evaluating myocardial scars. (13, 14) CMR provided better spatial  
244 resolution resulting in a higher accuracy for detecting myocardial scars. (15) In addition,  
245 SPECT with <sup>99m</sup>Tc sestamibi was known for its limitation in classifying true myocardial scars  
246 and hibernating viable myocardium. Myocardial scars were overestimated from SPECT with  
247 <sup>99m</sup>Tc sestamibi when compared with SPECT with Thallium-201 (<sup>201</sup>Tl), positron emission  
248 tomography with <sup>18</sup>F-Fludeoxyglucose, and CMR. (16-18) The limitations of SPECT with  
249 <sup>99m</sup>Tc sestamibi may be the explanation for the different results in our study. One study  
250 diagnosing myocardial scars with 1.5 Tesla CMR also reported higher sensitivity (68%) and  
251 PPV (95%) with lower specificity (30%) and NPV (5%) compared to our study. (19)  
252 However, the previous study included patients with a history of myocardial infarction which  
253 was a dissimilar population to our study. Compared to 3.0 Tesla CMR, likewise, 1.5 Tesla  
254 CMR has a lower signal-to-noise ratio and blood-to-myocardial contrast causing a poorer

255 accuracy for myocardial scar identification. Another noteworthy finding in our study is that  
256 detecting f-QRS in the inferior territory exhibited higher sensitivity but lower specificity  
257 compared to other regions. One hypothesis is that other related factors may influence the  
258 presence of f-QRS in interior territories. A study of f-QRS in healthy adults found that they  
259 are most commonly detected as inferior leads and associated with left deviation of the frontal  
260 QRS axis rather than myocardial scars, (20) Additionally, f-QRS in inferior leads may be  
261 associated with epicardial fat and metabolic syndrome. This relationship has been noted in  
262 the previous study. (21)

263 Almost all of the previous publications investigated the diagnostic performance of f-  
264 QRS only in the context of ischemic scars (e.g., patients with coronary artery disease and  
265 myocardial infarction). Our study explored the performance of f-QRS in both ischemic and  
266 non-ischemic scars. This study demonstrated a higher sensitivity, PPV, and LR+ of f-QRS for  
267 detecting non-ischemic scars with an indifferent specificity, NPV, LR-, and AUC. These  
268 findings were consistent in all EKG categories, LV segments, and low-pass filter ranges.  
269 Even with higher performance, unfortunately, f-QRS was inadequate to use as a non-ischemic  
270 scar indicator. Unlike our findings, two studies that examined the value of f-QRS in patients  
271 with nonischemic dilated cardiomyopathy and hypertrophic cardiomyopathy found an  
272 excellent association between f-QRS and myocardial scars. (22, 23) In contrast to our study  
273 which included 329 patients with non-ischemic scars (19% of overall participants), these 2  
274 studies included only 17 and 39 patients in their analysis. Moreover, the population in these  
275 studies was different from our study.

276 According to its higher sensitivity, an EKG with 0.15-100 or 0.15-150 Hz low-pass  
277 filters was theoretically suitable and considered a standard filter for detecting f-QRS. (8)  
278 However, these filter ranges were not acquired in routine clinical practice which usually used

279 a lower low-pass filter (e.g., 0.15-40 Hz). This was the first study that compared the  
280 performance of f-QRS from EKG with 0.15-40 (routine) and 0.15-100 Hz (standard) low-  
281 pass filters. The f-QRS from EKG with a standard 0.15-100 Hz low-pass filter expectedly  
282 demonstrated a higher sensitivity with lower specificity, PPV, and LR+. NPV, LR-, and AUC  
283 were not significantly different between the 2 filters. These findings informed that an EKG  
284 setting in routine practice may be more suitable to predict the presence of myocardial scar  
285 because of its higher specificity. Given lower sensitivity, nonetheless, this routine setting  
286 should not be used as a screening test.

287         The presence of f-QRS in the solitary lead revealed a higher sensitivity with a lower  
288 specificity, PPV, and LR+ when compared with standard 2 consecutive leads. Although the  
289 sensitivity was higher, f-QRS in a single lead was insufficient to be applied as a screening  
290 indicator for the presence of myocardial scars.

291         The mechanism that underlined the formation of f-QRS was an abnormal “zigzag”  
292 electrical conduction around the myocardial scars causing multiple spikes (fragmentation,  
293 high frequency) on the QRS complex. Myocardial scars are the area of fibrosis containing  
294 various types of extracellular substances. Given no viable cardiomyocyte and the presence of  
295 dense electrical insulate substances, electrical conduction cannot be conducted through and  
296 has to re-route around myocardial scars. (8) However, f-QRS are not recognized only in  
297 patients with myocardial scars. One study reported a high prevalence of f-QRS in healthy  
298 population (15.6% for inferior leads, 2.9% for anterior leads, and 0.5% for lateral leads)  
299 which was not much different from the population with known cardiac disease (16.7% for  
300 inferior leads, 3.8% for anterior leads, and 1.8% for lateral leads). (24) The f-QRS was also  
301 found to be associated with myocardial ischemia even though absence of scar. (25) In  
302 addition, f-QRS was depicted in patients with arrhythmic diseases such as Brugada syndrome

303 and long QT syndrome. The prevalence of f-QRS was as high as 80% when patients  
304 presented with ventricular arrhythmia and syncope. (26, 27) These studies suggested that f-  
305 QRS were not exclusively specific for myocardial scars.

306 A few problems regarding the diagnosis of f-QRS are currently unresolved. The  
307 present criteria proposed by Das, et al (2006) might include a benign variant of the QRS  
308 complex. Some publications have attempted to redefine the definition of pathologic f-QRS;  
309 though, no consensus was concluded. (28, 29) Moreover, diagnosing f-QRS was interpreter-  
310 dependent and filter-dependent. With the higher low-pass filter, the sensitivity of f-QRS was  
311 increased with a lower specificity trade-off. The most appropriate filter in this circumstance  
312 was unclear and needs more study to clarify this uncertainty. Most of the previous  
313 publications did not state interobserver and intraobserver reliability of f-QRS identification  
314 while our study demonstrated interobserver and intraobserver reliability of 0.78 and 0.78  
315 respectively. Despite good agreement indicated by these values, many f-QRS identifications  
316 were discordant.

317 There are several strong points of the current study. This study included the largest  
318 number of participants, nearly 1,700 participants, making the results of the study more robust.  
319 Moreover, we used 3.0 Tesla CMR as a reference test causing a higher accuracy of  
320 myocardial scar diagnosis. All EKGs were recorded just before the CMR scan, minimizing  
321 the effect of time on the accuracy of results. Importantly, the current study was the first study  
322 that examined the performance of f-QRS between different filter ranges and different  
323 numbers of leads.

324 This study had several limitations that are worth mentioning. Firstly, our study did not  
325 investigate the prognostic value of f-QRS. Many studies reported the association between f-

326 QRS and adverse cardiac outcomes in various cardiac diseases. (6, 30-32) Secondly, all  
327 EKGs were analyzed on a high-definition display with digital software that can increase the  
328 size of EKG waves. With this method of interpretation, the f-QRS detection rate might be  
329 more prevalent compared to the paper EKG. This can limit the external generalizability of  
330 our result. Thirdly, CMR findings were retrieved from the database and not re-analyzed.  
331 However, all CMR studies in our center were processed and interpreted by cardiac imaging  
332 specialists making the reports reliable. Fourthly, the association of f-QRS and the extension  
333 and patterns of myocardial scars were not investigated. Knowing these associations may lead  
334 to a further understanding of the true value of f-QRS. Lastly, this study did not classify the  
335 types of f-QRS. As mentioned before, the exact type of f-QRS that best predicted myocardial  
336 scar was unclear.

337

## 338 **CONCLUSION**

339 This study illustrated the limitations of f-QRS and raised the concern about the usage  
340 of f-QRS as a marker of myocardial scars. Given its high specificity, however, the presence  
341 of f-QRS from EKG performed in routine clinical practice may still be used to rule in the  
342 suspected patients for further investigation. We also emphasized the necessity of re-defining  
343 the f-QRS diagnostic criteria and validating this criterion with standard scar-detecting  
344 modality namely contrast-enhanced CMR.



## 345 REFERENCES

- 346 1. Longo D, et al. *Electrocardiography*. Harrison's principle of internal medicine. 20th ed:  
347 McGraw-Hill Education LLC.; 2020. p. 1831-9.
- 348 2. Das MK, Zipes DP. Fragmented QRS: a predictor of mortality and sudden cardiac death.  
349 *Heart Rhythm*. 2009;6(3 Suppl):S8-14.
- 350 3. Fares H, Heist K, Lavie CJ, Kumbala D, Ventura H, Meadows R, et al. Fragmented QRS  
351 complexes-a novel but underutilized electrocardiographic marker of heart disease. *Crit Pathw Cardiol*.  
352 2013;12(4):181-3.
- 353 4. Das MK, Khan B, Jacob S, Kumar A, Mahenthiran J. Significance of a fragmented QRS complex  
354 versus a Q wave in patients with coronary artery disease. *Circulation*. 2006;113(21):2495-501.
- 355 5. Das MK, Saha C, El Masry H, Peng J, Dandamudi G, Mahenthiran J, et al. Fragmented QRS on  
356 a 12-lead ECG: a predictor of mortality and cardiac events in patients with coronary artery disease.  
357 *Heart Rhythm*. 2007;4(11):1385-92.
- 358 6. Korhonen P, Husa T, Konttila T, Tierala I, Mäkijärvi M, Väänänen H, et al. Fragmented QRS in  
359 prediction of cardiac deaths and heart failure hospitalizations after myocardial infarction. *Ann*  
360 *Noninvasive Electrocardiol*. 2010;15(2):130-7.
- 361 7. Sadeghi R, Dabbagh VR, Tayyebi M, Zakavi SR, Ayati N. Diagnostic value of fragmented QRS  
362 complex in myocardial scar detection: systematic review and meta-analysis of the literature. *Kardiol*  
363 *Pol*. 2016;74(4):331-7.
- 364 8. Take Y, Morita H. Fragmented QRS: What Is The Meaning? *Indian Pacing Electrophysiol J*.  
365 2012;12(5):213-25.
- 366 9. Das MK, Suradi H, Maskoun W, Michael MA, Shen C, Peng J, et al. Fragmented wide QRS on a  
367 12-lead ECG: a sign of myocardial scar and poor prognosis. *Circ Arrhythm Electrophysiol*.  
368 2008;1(4):258-68.
- 369 10. Mahrholdt H, Wagner A, Judd RM, Sechtem U, Kim RJ. Delayed enhancement cardiovascular  
370 magnetic resonance assessment of non-ischaeamic cardiomyopathies. *Eur Heart J*. 2005;26(15):1461-  
371 74.
- 372 11. Mahenthiran J, Khan BR, Sawada SG, Das MK. Fragmented QRS complexes not typical of a  
373 bundle branch block: a marker of greater myocardial perfusion tomography abnormalities in  
374 coronary artery disease. *J Nucl Cardiol*. 2007;14(3):347-53.
- 375 12. Dabbagh Kakhki VR, Ayati N, Zakavi SR, Sadeghi R, Tayyebi M, Shariati F. Comparison  
376 between fragmented QRS and Q waves in myocardial scar detection using myocardial perfusion  
377 single photon emission computed tomography. *Kardiol Pol*. 2015;73(6):437-44.
- 378 13. Kim RJ, Wu E, Rafael A, Chen EL, Parker MA, Simonetti O, et al. The use of contrast-enhanced  
379 magnetic resonance imaging to identify reversible myocardial dysfunction. *N Engl J Med*.  
380 2000;343(20):1445-53.
- 381 14. Mann DL. *Electrocardiography*. Braunwald's heart disease. 12nd ed. Philadelphia: Elsevier Inc;  
382 2015. p. 114-53.
- 383 15. Wagner A, Mahrholdt H, Holly TA, Elliott MD, Regenfus M, Parker M, et al. Contrast-  
384 enhanced MRI and routine single photon emission computed tomography (SPECT) perfusion imaging  
385 for detection of subendocardial myocardial infarcts: an imaging study. *Lancet*. 2003;361(9355):374-  
386 9.
- 387 16. Cuocolo A, Pace L, Ricciardelli B, Chiariello M, Trimarco B, Salvatore M. Identification of  
388 viable myocardium in patients with chronic coronary artery disease: comparison of thallium-201  
389 scintigraphy with reinjection and technetium-99m-methoxyisobutyl isonitrile. *J Nucl Med*.  
390 1992;33(4):505-11.

- 391 17. Marzullo P, Sambuceti G, Parodi O. The role of sestamibi scintigraphy in the radioisotopic  
392 assessment of myocardial viability. *J Nucl Med.* 1992;33(11):1925-30.
- 393 18. Crean A, Khan SN, Davies LC, Coulden R, Dutka DP. Assessment of Myocardial Scar;  
394 Comparison Between F-FDG PET, CMR and Tc-Sestamibi. *Clin Med Cardiol.* 2009;3:69-76.
- 395 19. Ahn MS, Kim JB, Yoo BS, Lee JW, Lee JH, Youn YJ, et al. Fragmented QRS complexes are not  
396 hallmarks of myocardial injury as detected by cardiac magnetic resonance imaging in patients with  
397 acute myocardial infarction. *Int J Cardiol.* 2013;168(3):2008-13.
- 398 20. Tian Y, Zhang Y, Yan Q, Mao J, Dong J, Ma C, et al. Fragmented QRS Complex in Healthy  
399 Adults: Prevalence, Characteristics, Mechanisms, and Clinical Implications. *International Journal of*  
400 *Heart Rhythm.* 2017;2(1):34-9.
- 401 21. Sarıkaya R, Şengül C, Kümet Ö, İmre G, Akbulut T, Oğuz M. Fragmented QRS in inferior leads  
402 is associated with non-alcoholic fatty liver disease, body-mass index, and interventricular septum  
403 thickness in young men. *Anatol J Cardiol.* 2022;26(2):100-4.
- 404 22. Basaran Y, Tigen K, Karaahmet T, Isiklar I, Cevik C, Gurel E, et al. Fragmented QRS complexes  
405 are associated with cardiac fibrosis and significant intraventricular systolic dyssynchrony in  
406 nonischemic dilated cardiomyopathy patients with a narrow QRS interval. *Echocardiography.*  
407 2011;28(1):62-8.
- 408 23. Ratheendran AC, Subramanian M, Bhanu DK, Prabhu MA, Kannan R, Natarajan KU, et al.  
409 Fragmented QRS on electrocardiography as a predictor of myocardial scar in patients with  
410 hypertrophic cardiomyopathy. *Acta Cardiol.* 2020;75(1):42-6.
- 411 24. Terho HK, Tikkanen JT, Junntila JM, Anttonen O, Kenttä TV, Aro AL, et al. Prevalence and  
412 prognostic significance of fragmented QRS complex in middle-aged subjects with and without clinical  
413 or electrocardiographic evidence of cardiac disease. *Am J Cardiol.* 2014;114(1):141-7.
- 414 25. Hekmat S, Pourafkari L, Ahmadi M, Chavoshi MR, Zamani B, Nader ND. Fragmented QRS on  
415 surface electrocardiogram as a predictor of perfusion defect in patients with suspected coronary  
416 artery disease undergoing myocardial perfusion imaging. *Indian Heart J.* 2018;70 Suppl 3(Suppl  
417 3):S177-s81.
- 418 26. Morita H, Kusano KF, Miura D, Nagase S, Nakamura K, Morita ST, et al. Fragmented QRS as a  
419 marker of conduction abnormality and a predictor of prognosis of Brugada syndrome. *Circulation.*  
420 2008;118(17):1697-704.
- 421 27. Haraoka K, Morita H, Saito Y, Toh N, Miyoshi T, Nishii N, et al. Fragmented QRS is associated  
422 with torsades de pointes in patients with acquired long QT syndrome. *Heart Rhythm.*  
423 2010;7(12):1808-14.
- 424 28. Haukilahti MA, Eranti A, Kenttä T, Huikuri HV. QRS Fragmentation Patterns Representing  
425 Myocardial Scar Need to Be Separated from Benign Normal Variants: Hypotheses and Proposal for  
426 Morphology based Classification. *Front Physiol.* 2016;7:653.
- 427 29. Brohet C. Fragmentation of the QRS complex: the latest electrocardiographic craze? *Acta*  
428 *Cardiol.* 2019;74(3):185-7.
- 429 30. Gong B, Li Z. Total Mortality, Major Adverse Cardiac Events, and Echocardiographic-Derived  
430 Cardiac Parameters with Fragmented QRS Complex. *Ann Noninvasive Electrocardiol.* 2016;21(4):404-  
431 12.
- 432 31. Güngör B, Özcan KS, Karataş MB, Şahin İ, Öztürk R, Bolca O. Prognostic Value of QRS  
433 Fragmentation in Patients with Acute Myocardial Infarction: A Meta-Analysis. *Ann Noninvasive*  
434 *Electrocardiol.* 2016;21(6):604-12.
- 435 32. Jain R, Singh R, Yamini S, Das MK. Fragmented ECG as a risk marker in cardiovascular  
436 diseases. *Curr Cardiol Rev.* 2014;10(3):277-86.

437

438 **FIGURE AND TABLE LEGENDS**

439 Graphical Abstract

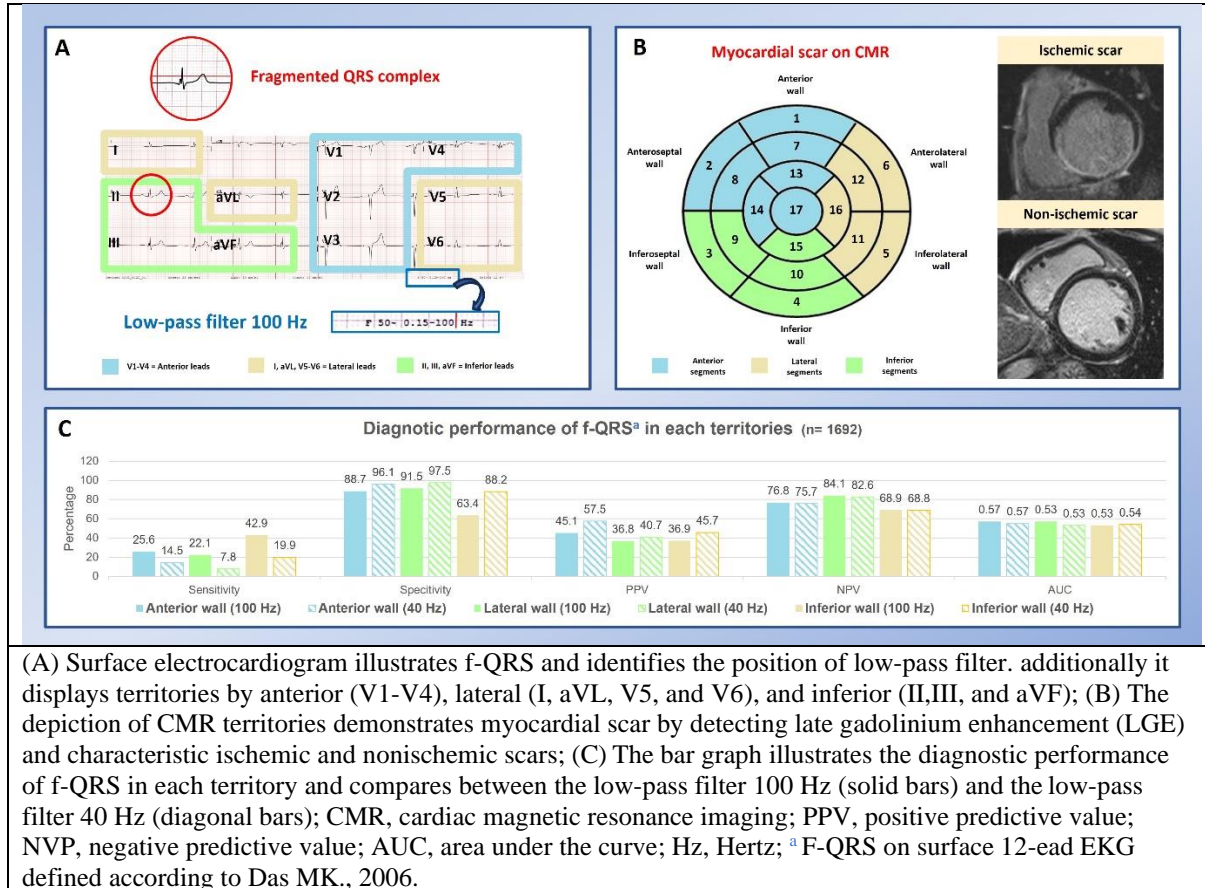

440

441 Figure 1. Study profile

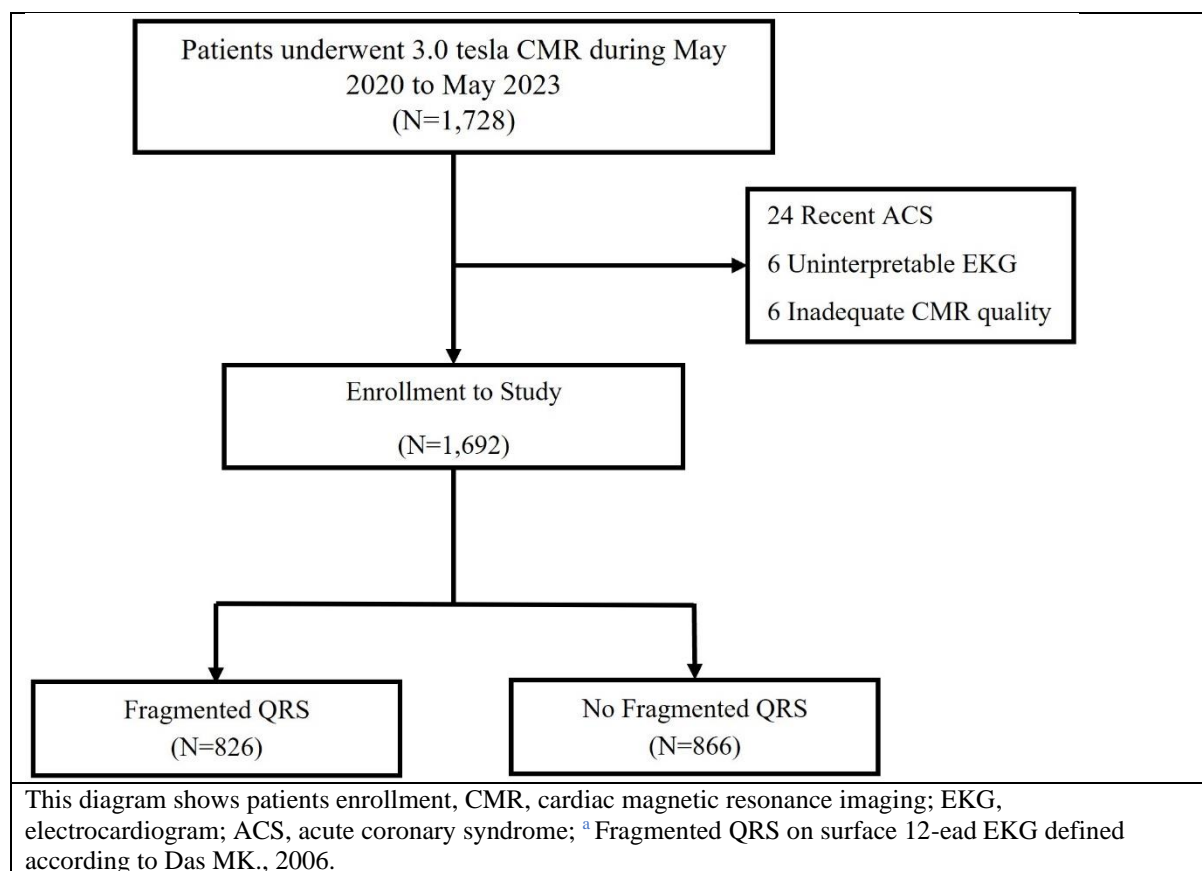

442

443

444

445

446

447

448 Table 1 Baseline characteristics

|                                                                                                                                                                                                                                                                                                                                                                                                  | Total<br>(N=1692) | No f-QRS<br>(N=866) | f-QRS<br>(N=826) | p-value |
|--------------------------------------------------------------------------------------------------------------------------------------------------------------------------------------------------------------------------------------------------------------------------------------------------------------------------------------------------------------------------------------------------|-------------------|---------------------|------------------|---------|
| Male, n (%)                                                                                                                                                                                                                                                                                                                                                                                      | 889 (52.5)        | 389 (46)            | 491 (59.4)       | <0.001  |
| Age (years), median (IQR)                                                                                                                                                                                                                                                                                                                                                                        | 67 (59-85)        | 68 (60-75)          | 67 (59-75)       | 0.62    |
| Hypertension, n (%)                                                                                                                                                                                                                                                                                                                                                                              | 1082 (64)         | 563 (65)            | 519 (62.8)       | 0.35    |
| Diabetes mellitus, n (%)                                                                                                                                                                                                                                                                                                                                                                         | 517 (30.6)        | 264 (30.5)          | 253 (30.6)       | 0.95    |
| Dyslipidemia, n (%)                                                                                                                                                                                                                                                                                                                                                                              | 1107 (65.5)       | 572 (66.1)          | 535 (64.8)       | 0.56    |
| eGFR (mL/min/1.73m <sup>2</sup> ), median (IQR)                                                                                                                                                                                                                                                                                                                                                  | 78 (61-91)        | 79 (60.5-92)        | 77 (61-90)       | 0.12    |
| CKD Stage, n (%)                                                                                                                                                                                                                                                                                                                                                                                 |                   |                     |                  | 0.32    |
| Stage 1                                                                                                                                                                                                                                                                                                                                                                                          | 471 (27.9)        | 257 (29.7)          | 214 (25.9)       |         |
| Stage 2                                                                                                                                                                                                                                                                                                                                                                                          | 818 (48.4)        | 400 (46.2)          | 418 (50.7)       |         |
| Stage 3                                                                                                                                                                                                                                                                                                                                                                                          | 347 (20.5)        | 183 (21.2)          | 164 (19.9)       |         |
| Stage 4                                                                                                                                                                                                                                                                                                                                                                                          | 28 (1.7)          | 13 (1.5)            | 15 (1.8)         |         |
| Stage 5                                                                                                                                                                                                                                                                                                                                                                                          | 26 (1.5)          | 12 (1.4)            | 14 (1.7)         |         |
| Coronary artery disease, n (%)                                                                                                                                                                                                                                                                                                                                                                   | 396 (23.4)        | 178 (20.6)          | 218 (26.4)       | 0.005   |
| Previous PCI, n (%)                                                                                                                                                                                                                                                                                                                                                                              | 225 (13.3)        | 107 (12.4)          | 118 (14.3)       | 0.24    |
| Previous CABG, n (%)                                                                                                                                                                                                                                                                                                                                                                             | 37 (2.2)          | 18 (2.1)            | 19 (2.3)         | 0.75    |
| LVEF (%), median (IQR)                                                                                                                                                                                                                                                                                                                                                                           | 61 (52-67)        | 62 (55-68)          | 61 (47-66)       | <0.001  |
| Presence of scar, n (%)                                                                                                                                                                                                                                                                                                                                                                          | 727 (43)          | 323 (37.3)          | 404 (48.9)       | <0.001  |
| Presence of infarct scar, n (%)                                                                                                                                                                                                                                                                                                                                                                  | 434 (25.7)        | 182 (21.0)          | 252 (30.5)       | <0.001  |
| Presence of non-infarct scar, n (%)                                                                                                                                                                                                                                                                                                                                                              | 329 (19.4)        | 150 (17.3)          | 179 (21.7)       | 0.02    |
| Data are presented as median (interquartile range) of frequency and percentage. eGFR, estimated glomerular filtration rate; CKD, chronic kidney disease; LVEF, left ventricular ejection fraction; PCI, percutaneous coronary intervention; CABG, coronary artery bypass graft; CMR, cardiac magnetic resonance imaging; <sup>a</sup> A scar refer to detected late gadolinium enhancement (LGE) |                   |                     |                  |         |

449

450

451

452

453 Table 2 Primary outcomes

|                                                                                                                                                                                                          | Sensitivity<br>(95%CI) | Specificity<br>(95%CI) | PPV<br>(95%CI)   | NVP<br>(95%CI)   | LR+<br>(95%CI)   | LR-<br>(95%CI)   | AUC<br>(95%CI)   |
|----------------------------------------------------------------------------------------------------------------------------------------------------------------------------------------------------------|------------------------|------------------------|------------------|------------------|------------------|------------------|------------------|
| Anterior leads and LV segments                                                                                                                                                                           |                        |                        |                  |                  |                  |                  |                  |
| 40-Hz filter                                                                                                                                                                                             | 14.5 (11.4-18.1)       | 96.1 (94.9-97.1)       | 57.5 (47.9-66.8) | 75.7 (73.5-77.8) | 3.75 (1.92-5.58) | 0.89 (0.82-0.96) | 0.55 (0.54-0.57) |
| 100-Hz filter                                                                                                                                                                                            | 25.6 (21.6-29.9)       | 88.7 (86.8-90.4)       | 45.1 (38.9-51.4) | 76.8 (74.5-78.9) | 2.27 (1.52-3.02) | 0.84 (0.81-0.87) | 0.57 (0.55-0.59) |
| Lateral leads and LV segments                                                                                                                                                                            |                        |                        |                  |                  |                  |                  |                  |
| 40-Hz filter                                                                                                                                                                                             | 7.8 (5.1-11.4)         | 97.5 (96.5-98.2)       | 40.7 (28.1-54.3) | 82.6 (80.7-84.4) | 3.08 (1.74-4.42) | 0.95 (0.93-0.97) | 0.53 (0.51-0.54) |
| 100-Hz filter                                                                                                                                                                                            | 22.1 (17.6-27.1)       | 91.5 (90-93)           | 36.8 (29.8-44.1) | 84.1 (82.1-85.9) | 2.61 (1.79-3.43) | 0.85 (0.82-0.88) | 0.57 (0.54-0.59) |
| Inferior leads and LV segments                                                                                                                                                                           |                        |                        |                  |                  |                  |                  |                  |
| 40-Hz filter                                                                                                                                                                                             | 19.9 (16.6-23.4)       | 88.2 (86.2-90)         | 45.7 (39.4-52.2) | 68.8 (66.3-71.1) | 1.68 (1.24-2.12) | 0.91 (0.87-0.95) | 0.54 (0.52-0.56) |
| 100-Hz filter                                                                                                                                                                                            | 42.9 (38.8-47.1)       | 63.4 (60.5-66.2)       | 36.9 (33.2-40.8) | 68.9 (66-71.8)   | 1.17 (0.96-1.38) | 0.90 (0.85-0.95) | 0.53 (0.51-0.56) |
| Diagnostic performance of f-QRS for detecting myocardial scars; LR, likelihood ratio; PPV, positive predictive value; NVP, negative predictive value; OR, odd ratio; CI, confidence interval; Hz, Hertz. |                        |                        |                  |                  |                  |                  |                  |

454

455

456

457

458 Supplementary table 1 Ischemic vs Non ischemic scars

|                                | Sensitivity<br>(95%CI) | Specificity<br>(95%CI) | PPV<br>(95%CI)   | NVP<br>(95%CI)   | LR+<br>(95%CI)   | LR-<br>(95%CI)   | AUC<br>(95%CI)   |
|--------------------------------|------------------------|------------------------|------------------|------------------|------------------|------------------|------------------|
| Ischemic scars                 |                        |                        |                  |                  |                  |                  |                  |
| Anterior leads and LV segments |                        |                        |                  |                  |                  |                  |                  |
| 40-Hz filter                   | 12.8 (7.5-20)          | 96.3 (95-97.3)         | 27.6 (16.7-40.9) | 90.9 (89.1-92.5) | 3.45 (2.96-3.94) | 0.91 (0.88-0.94) | 0.55 (0.52-0.58) |
| 100-Hz filter                  | 20.8 (14.1-29)         | 89.1 (87.1-90.8)       | 17.3 (11.6-24.4) | 91.1 (89.2-92.7) | 1.9 (1.24-2.56)  | 0.89 (0.84-0.94) | 0.55 (0.51-0.59) |
| Lateral leads and LV segments  |                        |                        |                  |                  |                  |                  |                  |
| 40-Hz filter                   | 3.1 (0.4-10.7)         | 98.2 (97.3-98.9)       | 8.7 (1.1-28)     | 94.9 (93.5-96.1) | 1.75 (0.97-2.53) | 0.99 (0.97-1.01) | 0.51 (0.49-0.53) |
| 100-Hz filter                  | 13.8 (6.5-24.7)        | 92.5 (90.9-94)         | 9.2 (4.3-16.7)   | 95.2 (93.8-96.3) | 1.86 (1.21-2.51) | 0.93 (0.9-0.97)  | 0.53 (0.49-0.58) |
| Inferior leads and LV segments |                        |                        |                  |                  |                  |                  |                  |
| 40-Hz filter                   | 12.7 (8.9-17.5)        | 88.7 (86.5-90.6)       | 21.9 (15.5-29.5) | 80.2 (77.8-82.5) | 1.12 (0.94-1.30) | 0.99 (0.94-1.04) | 0.51 (0.48-0.53) |
| 100-Hz filter                  | 41.7 (35.5-48)         | 63.4 (60.4-66.4)       | 22.2 (18.5-26.2) | 81.3 (78.4-83.9) | 1.14 (0.99-1.29) | 0.92 (0.89-0.95) | 0.53 (0.49-0.56) |
| Nonischemic scars              |                        |                        |                  |                  |                  |                  |                  |
| Anterior leads and LV segments |                        |                        |                  |                  |                  |                  |                  |
| 40-Hz filter                   | 14.5 (10.7-19.1)       | 96.3 (94.9-97.3)       | 51.8 (40.6-62.9) | 80.2 (77.9-82.4) | 3.88 (2.76-4.99) | 0.89 (0.82-0.92) | 0.55 (0.53-0.58) |
| 100-Hz filter                  | 27 (22.1-32.5)         | 88.8 (86.8-90.7)       | 40.2 (33.3-47.4) | 81.4 (79.1-83.6) | 2.42 (2.12-2.73) | 0.82 (0.8-0.85)  | 0.58 (0.55-0.61) |
| Lateral leads and LV segments  |                        |                        |                  |                  |                  |                  |                  |

|                                                                                                                                                                                                                         |                  |                  |                  |                  |                  |                  |                  |
|-------------------------------------------------------------------------------------------------------------------------------------------------------------------------------------------------------------------------|------------------|------------------|------------------|------------------|------------------|------------------|------------------|
| 40-Hz filter                                                                                                                                                                                                            | 8.3 (5-12.7)     | 97.6 (96.5-98.4) | 39.1 (25.1-54.6) | 84.8 (82.8-86.7) | 3.38 (2.89-3.87) | 0.94 (0.89-0.97) | 0.53 (0.51-0.55) |
| 100-Hz filter                                                                                                                                                                                                           | 24.3 (18.8-30.6) | 92.6 (90.9-94)   | 38.4 (30.3-47.1) | 86.5 (84.5-88.4) | 3.27 (2.76-3.78) | 0.82 (0.79-0.86) | 0.58 (0.56-0.61) |
| Inferior leads and LV segments                                                                                                                                                                                          |                  |                  |                  |                  |                  |                  |                  |
| 40-Hz filter                                                                                                                                                                                                            | 25.5 (20.5-31)   | 88.2 (86.1-90)   | 36 (29.4-43.1)   | 81.9 (79.6-84.1) | 2.16 (1.98-2.34) | 0.85 (0.79-0.91) | 0.57 (0.54-0.6)  |
| 100-Hz filter                                                                                                                                                                                                           | 43.6 (37.7-49.6) | 63.5 (60.5-66.3) | 23.7 (20.1-27.7) | 81.2 (78.4-83.8) | 1.19 (1.01-1.37) | 0.89 (0.83-0.95) | 0.54 (0.5-0.57)  |
| Diagnostic performance of f-QRS for detecting ischemic and non-ischemic scars; LR, likelihood ratio; PPV, positive predictive value; NVP, negative predictive value; OR, odd ratio; CI, confidence interval; Hz, Hertz. |                  |                  |                  |                  |                  |                  |                  |

459

460

461

462

463

464

465

466



## 467 Supplementary table 2 Solitary lead

|                                                                                                                                                                                                         | Sensitivity<br>(95%CI) | Specificity<br>(95%CI) | PPV<br>(95%CI)   | NVP<br>(95%CI)   | LR+<br>(95%CI)   | LR-<br>(95%CI)   | AUC<br>(95%CI)   |
|---------------------------------------------------------------------------------------------------------------------------------------------------------------------------------------------------------|------------------------|------------------------|------------------|------------------|------------------|------------------|------------------|
| Anterior leads and LV segments                                                                                                                                                                          |                        |                        |                  |                  |                  |                  |                  |
| 40-Hz filter                                                                                                                                                                                            | 31.8 (27.6-36.4)       | 88.7 (86.8-90.4)       | 50.5 (44.5-56.5) | 78.3 (76-80.4)   | 2.83 (2.61-3.12) | 0.77 (0.69-0.85) | 0.6 (0.58-0.63)  |
| 100-Hz filter                                                                                                                                                                                           | 51.2 (46.5-55.9)       | 63.1 (60.3-65.8)       | 33.4 (29.9-37)   | 78.2 (75.5-80.7) | 1.39 (1.22-1.56) | 0.77 (0.67-0.87) | 0.57 (0.55-0.6)  |
| Lateral leads and LV segments                                                                                                                                                                           |                        |                        |                  |                  |                  |                  |                  |
| 40-Hz filter                                                                                                                                                                                            | 22.1 (17.6-27.1)       | 93 (91.5-94.3)         | 41.2 (33.6-49.1) | 84.3 (82.4-86.1) | 3.15 (2.58-3.72) | 0.84 (0.79-0.89) | 0.58 (0.55-0.6)  |
| 100-Hz filter                                                                                                                                                                                           | 41.6 (36-47.3)         | 76.4 (74-78.6)         | 28.1 (24-32.5)   | 85.4 (83.4-87.4) | 1.76 (1.27-2.25) | 0.77 (0.70-0.84) | 0.59 (0.56-0.62) |
| Inferior leads and LV segments                                                                                                                                                                          |                        |                        |                  |                  |                  |                  |                  |
| 40-Hz filter                                                                                                                                                                                            | 35.5 (31.5-39.6)       | 74.3 (71.6-76.8)       | 40.8 (36.4-45.3) | 69.7 (67-72.3)   | 1.38 (1.11-1.65) | 0.87 (0.82-0.92) | 0.55 (0.53-0.57) |
| 100-Hz filter                                                                                                                                                                                           | 59.4 (55.2-63.5)       | 43.4 (40.4-46.3)       | 34.4 (31.4-37.5) | 68.1 (64.6-71.5) | 1.05 (0.94-1.16) | 0.94 (0.89-0.99) | 0.51 (0.49-0.54) |
| Diagnostic performance of f-QRS in the solitary lead for detecting myocardial scars; PPV, positive predictive value; NVP, negative predictive value; OR, odd ratio; CI, confidence interval; Hz, Hertz. |                        |                        |                  |                  |                  |                  |                  |

468

469

470 **Acknowledgements**

471 None

472 **Disclosure**

473 Nothing to disclosure

474

475 **Funding**

476 None

477
